# Supplementary material
Source: PubMed Central journal article supplement (PMC9812531)
Supplement: NIHMS1858779-supplement-1858779_RS.pdf [file NIHMS1858779-supplement-1858779_RS.pdf]

## Reporting Summary

Nature Research wishes to improve the reproducibility of the work that we publish. This form provides structure for consistency and transparency in reporting. For further information on Nature Research policies, see our [Editorial Policies](#) and the [Editorial Policy Checklist](#).

### Statistics

For all statistical analyses, confirm that the following items are present in the figure legend, table legend, main text, or Methods section.

n/a Confirmed

- The exact sample size ( $n$ ) for each experimental group/condition, given as a discrete number and unit of measurement
- A statement on whether measurements were taken from distinct samples or whether the same sample was measured repeatedly
- The statistical test(s) used AND whether they are one- or two-sided  
*Only common tests should be described solely by name; describe more complex techniques in the Methods section.*
- A description of all covariates tested
- A description of any assumptions or corrections, such as tests of normality and adjustment for multiple comparisons
- A full description of the statistical parameters including central tendency (e.g. means) or other basic estimates (e.g. regression coefficient) AND variation (e.g. standard deviation) or associated estimates of uncertainty (e.g. confidence intervals)
- For null hypothesis testing, the test statistic (e.g.  $F$ ,  $t$ ,  $r$ ) with confidence intervals, effect sizes, degrees of freedom and  $P$  value noted  
*Give  $P$  values as exact values whenever suitable.*
- For Bayesian analysis, information on the choice of priors and Markov chain Monte Carlo settings
- For hierarchical and complex designs, identification of the appropriate level for tests and full reporting of outcomes
- Estimates of effect sizes (e.g. Cohen's  $d$ , Pearson's  $r$ ), indicating how they were calculated

*Our web collection on [statistics for biologists](#) contains articles on many of the points above.*

### Software and code

Policy information about [availability of computer code](#)

Data collection Serial EM 3.6.21

Data analysis Relion 3, cryoSPARC 2.13, MotionCor2 1.2.6, Gctf 1.0.6, Phenix 1.12, Coot 0.8.9, Pymol 2.3.4, Chimera 1.12, GraphPad Prism 6.00, LigPlot+ 2.2

For manuscripts utilizing custom algorithms or software that are central to the research but not yet described in published literature, software must be made available to editors and reviewers. We strongly encourage code deposition in a community repository (e.g. GitHub). See the Nature Research [guidelines for submitting code & software](#) for further information.

### Data

Policy information about [availability of data](#)

All manuscripts must include a [data availability statement](#). This statement should provide the following information, where applicable:

- Accession codes, unique identifiers, or web links for publicly available datasets
- A list of figures that have associated raw data
- A description of any restrictions on data availability

The cryo-EM density maps have been deposited in the Electron Microscopy Data Bank under accession codes EMD-22598, EMD-22599, EMD-22600, EMD-22601, EMD-22602, EMD-22604, EMD-22605, EMD-22606 and EMD-22608. The corresponding atomic models have been deposited in the Protein Data Bank under accession codes 7K0I, 7K0J, 7K0K, 7K0L, 7K0M, 7K0N, 7K0O, 7K0P and 7K0Q. Source data are available with the paper online.

## Field-specific reporting

Please select the one below that is the best fit for your research. If you are not sure, read the appropriate sections before making your selection.

- Life sciences       Behavioural & social sciences       Ecological, evolutionary & environmental sciences

For a reference copy of the document with all sections, see [nature.com/documents/nr-reporting-summary-flat.pdf](https://www.nature.com/documents/nr-reporting-summary-flat.pdf)

## Life sciences study design

All studies must disclose on these points even when the disclosure is negative.

|                 |                                                                                                                                                                        |
|-----------------|------------------------------------------------------------------------------------------------------------------------------------------------------------------------|
| Sample size     | <input type="text" value="No statistical methods were used to predetermine sample sizes."/>                                                                            |
| Data exclusions | <input type="text" value="No exclusion criteria were pre-established. No data was excluded from the activity assays"/>                                                 |
| Replication     | <input type="text" value="All attempts to replicate the experiments were successful"/>                                                                                 |
| Randomization   | <input type="text" value="This is not relevant for our study because we were not comparing two sets of individuals who had been selected as control or sample group"/> |
| Blinding        | <input type="text" value="As we were not comparing animal or human populations with individuals assigned to groups, it was not relevant to do double blind tests"/>    |

## Reporting for specific materials, systems and methods

We require information from authors about some types of materials, experimental systems and methods used in many studies. Here, indicate whether each material, system or method listed is relevant to your study. If you are not sure if a list item applies to your research, read the appropriate section before selecting a response.

### Materials & experimental systems

| n/a                                 | Involvement in the study                                  |
|-------------------------------------|-----------------------------------------------------------|
| <input checked="" type="checkbox"/> | <input type="checkbox"/> Antibodies                       |
| <input type="checkbox"/>            | <input checked="" type="checkbox"/> Eukaryotic cell lines |
| <input checked="" type="checkbox"/> | <input type="checkbox"/> Palaeontology and archaeology    |
| <input checked="" type="checkbox"/> | <input type="checkbox"/> Animals and other organisms      |
| <input checked="" type="checkbox"/> | <input type="checkbox"/> Human research participants      |
| <input checked="" type="checkbox"/> | <input type="checkbox"/> Clinical data                    |
| <input checked="" type="checkbox"/> | <input type="checkbox"/> Dual use research of concern     |

### Methods

| n/a                                 | Involvement in the study                        |
|-------------------------------------|-------------------------------------------------|
| <input checked="" type="checkbox"/> | <input type="checkbox"/> ChIP-seq               |
| <input checked="" type="checkbox"/> | <input type="checkbox"/> Flow cytometry         |
| <input checked="" type="checkbox"/> | <input type="checkbox"/> MRI-based neuroimaging |

## Eukaryotic cell lines

Policy information about [cell lines](#)

|                                                                      |                                                                                                             |
|----------------------------------------------------------------------|-------------------------------------------------------------------------------------------------------------|
| Cell line source(s)                                                  | <input type="text" value="HEK293S GnTI- (ATCC CRL-3022), Sf9 (ATCC CRL-1711)."/>                            |
| Authentication                                                       | <input type="text" value="No further authentication was performed for commercially available cell lines."/> |
| Mycoplasma contamination                                             | <input type="text" value="The cell line was not tested for mycoplasma contamination."/>                     |
| Commonly misidentified lines<br>(See <a href="#">ICLAC</a> register) | <input type="text" value="No commonly misidentified cell lines were used"/>                                 |
